# Supplementary material for: An exploration of surface temperature asymmetries as potential markers of affective states in calves experiencing or observing disbudding
Source: PubMed Central journal article supplement (PMC11589073; doi:10.1017/awf.2024.47), 2024-11-05
Supplement: S0962728624000472sup001.pdf [file S0962728624000472sup001.pdf]

**Table S1. Final model for asymmetries in Front Ear max temperature (L-R)**

| Variable      | Categories                         | coefficient        | S.E.   | P-value   | Asymmetries towards | Active hemisphere (hypothesised) |
|---------------|------------------------------------|--------------------|--------|-----------|---------------------|----------------------------------|
| Constant      | n/a                                | 0.584              | 0.2829 | $P=0.039$ |                     |                                  |
| Recording day | Disbudding day (D2)                | Reference category |        |           |                     |                                  |
|               | Day before disbudding session (D1) | -0.850             | 0.322  | $P=0.005$ | Right ear           | Left hemisphere                  |
|               | Day after disbudding session (D3)  | -0.381             | 0.322  | $P=0.214$ |                     |                                  |

**Table S2. Final model for Muzzle maximum temperature**

| Variable | Categories | Mean   | S.E.  | P-value   |
|----------|------------|--------|-------|-----------|
| Constant |            | 32.994 | 0.177 | $P<0.001$ |
| THI      | n/a        | 0.227  | 0.024 | $P<0.001$ |

**Table S3. Final model for Muzzle average temperature**

| Variable | Categories | Mean   | S.E.  | P-value   |
|----------|------------|--------|-------|-----------|
| Constant |            | 29.749 | 0.307 | $P<0.001$ |
| THI      | n/a        | 0.418  | 0.040 | $P<0.001$ |

**Table S4. Final model for Hair Whorl max temperature**

| Variable | Categories | Coefficient | S.E.  | P-value     |
|----------|------------|-------------|-------|-------------|
| Constant |            | 30.523      | 0.266 | $P < 0.001$ |
| THI      | n/a        | 0.335       | 0.032 | $P < 0.001$ |

**Table S5. Final model for Inner Corner Eye max temperature (L-R) in the disbudding session (D2 x T1)**

| Variable   | Categories | Mean               | S.E.  | P-value     | Asymmetries towards | Active hemisphere (hypothesised) |
|------------|------------|--------------------|-------|-------------|---------------------|----------------------------------|
| Constant   | n/a        | -0.081             | 0.105 | $P = 0.444$ |                     |                                  |
| Calf group | InexObs    | Reference category |       |             |                     |                                  |
|            | Disbudded  | 0.183              | 0.235 | $P = 0.434$ |                     |                                  |
|            | ExpObs     | 0.625              | 0.235 | $P = 0.008$ | Left eye            | Right hemisphere                 |

**Table S6. Final model for Inner Corner Eye max temperature (L-R) on D3 x T1**

| <b>Variable</b>             | <b>Categories</b> | <b>Coefficient</b> | <b>S.E.</b> | <b>P-value</b>   | <b>Asymmetries towards</b> | <b>Active hemisphere (hypothesised)</b> |
|-----------------------------|-------------------|--------------------|-------------|------------------|----------------------------|-----------------------------------------|
| Constant                    | n/a               | 0.534              | 0.246       | <i>P</i> =0.030  |                            |                                         |
| Calf response to the camera | Move away         | Reference category |             |                  |                            |                                         |
|                             | Approach          | -0.707             | 0.336       | <i>P</i> =0.035  | Right eye                  | Left hemisphere                         |
|                             | Not moving        | 0.182              | 0.274       | <i>P</i> =0.507  |                            |                                         |
| Calf group                  | InexObs           | Reference category |             |                  |                            |                                         |
|                             | Disbudded         | -0.680             | 0.246       | <i>P</i> = 0.006 | Right eye                  | Left hemisphere                         |
|                             | ExpObs            | -0.793             | 0.260       | <i>P</i> = 0.002 | Right eye                  | Left hemisphere                         |
